# Supplementary material for: Unveiling protonated form of 2,6-di-m-phenylpyridine embedded isosmaragdyrin analogue and its organo-Pd(ii) complex
Source: Royal Society of Chemistry journal article supplement (doi:10.1039/d3nj03432a), 2023-01-01
Supplement: d3nj03432a1.pdf [file d3nj03432a1.pdf]

## Electronic Supporting Information

### Unveiling Protonated Form of 2,6-Di-*m*-phenylpyridine Embedded Isosmaragdyrin analogue and Its Organo-Pd(II) complex

Sourav Ranjan Pradhan,<sup>a</sup> M. Murugavel,<sup>a</sup> Sangya Chitranshi,<sup>a</sup> Gakhyun Kim,<sup>b</sup>  
Dongho Kim,<sup>b</sup> Mainak Das<sup>\*a, c</sup> and A. Srinivasan<sup>\*a</sup>

<sup>a</sup>National Institute of Science Education and Research (NISER), An OCC of Homi Bhabha National Institute, Bhubaneswar 752050, Odisha, India

<sup>b</sup>Department of Chemistry and Spectroscopy Laboratory for Functional  $\pi$ -Electronic Systems, Yonsei University Seoul 03722, Korea

<sup>c</sup>Department of Chemistry, Jagiellonian University, Gronostajowa 2, 30-387, Kraków, Poland

#### Corresponding Author

\*E-mail: dasabhramainak@niser.ac.in, srini@niser.ac.in.

#### Table of Contents:

|                                                                                                                                              |         |
|----------------------------------------------------------------------------------------------------------------------------------------------|---------|
| 1. Mass spectral analysis                                                                                                                    | : 2     |
| 2. NMR spectral analysis                                                                                                                     | : 3-6   |
| 3. Single crystal X-ray structure and analysis of H <sub>2</sub> 5 <sup>2+</sup> .2CF <sub>3</sub> CO <sub>2</sub> <sup>-</sup> and <b>8</b> | : 7-14  |
| 4. Electronic absorption spectral analysis                                                                                                   | : 15    |
| 5. Theoretical Calculations                                                                                                                  | : 16-27 |
| 6. References                                                                                                                                | : 28    |

## 1. Mass Spectral Analyses:

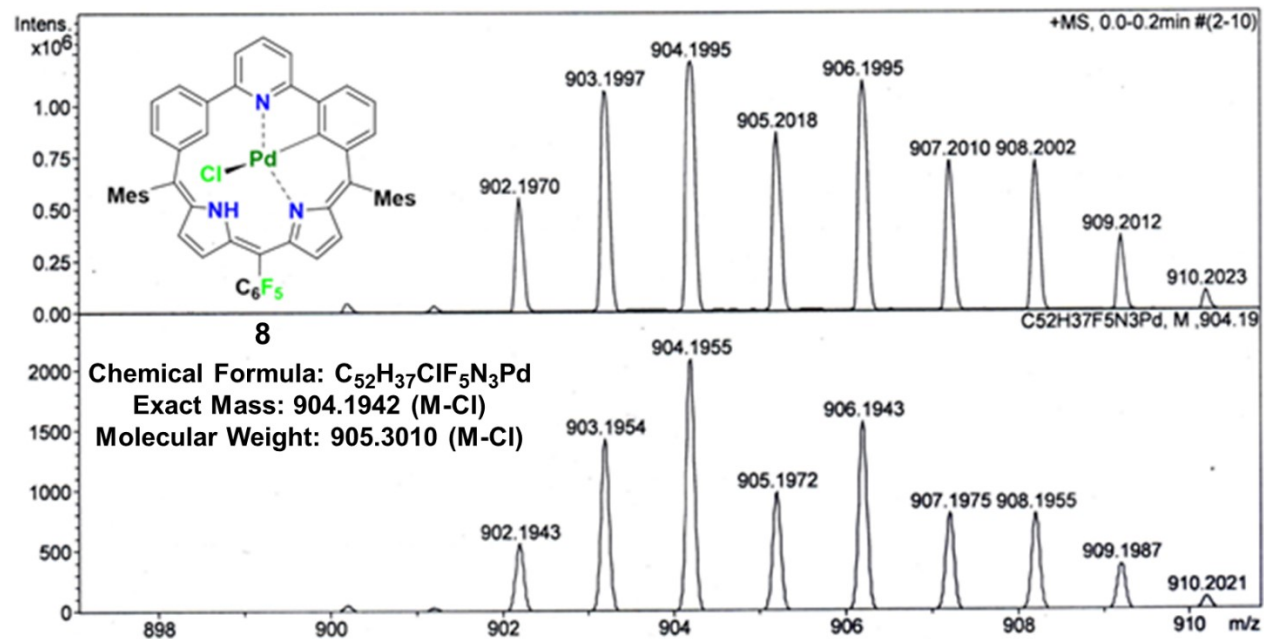

Fig. S1 HR-ESI MS spectrum of **8**.

## 2. NMR Spectral analysis:

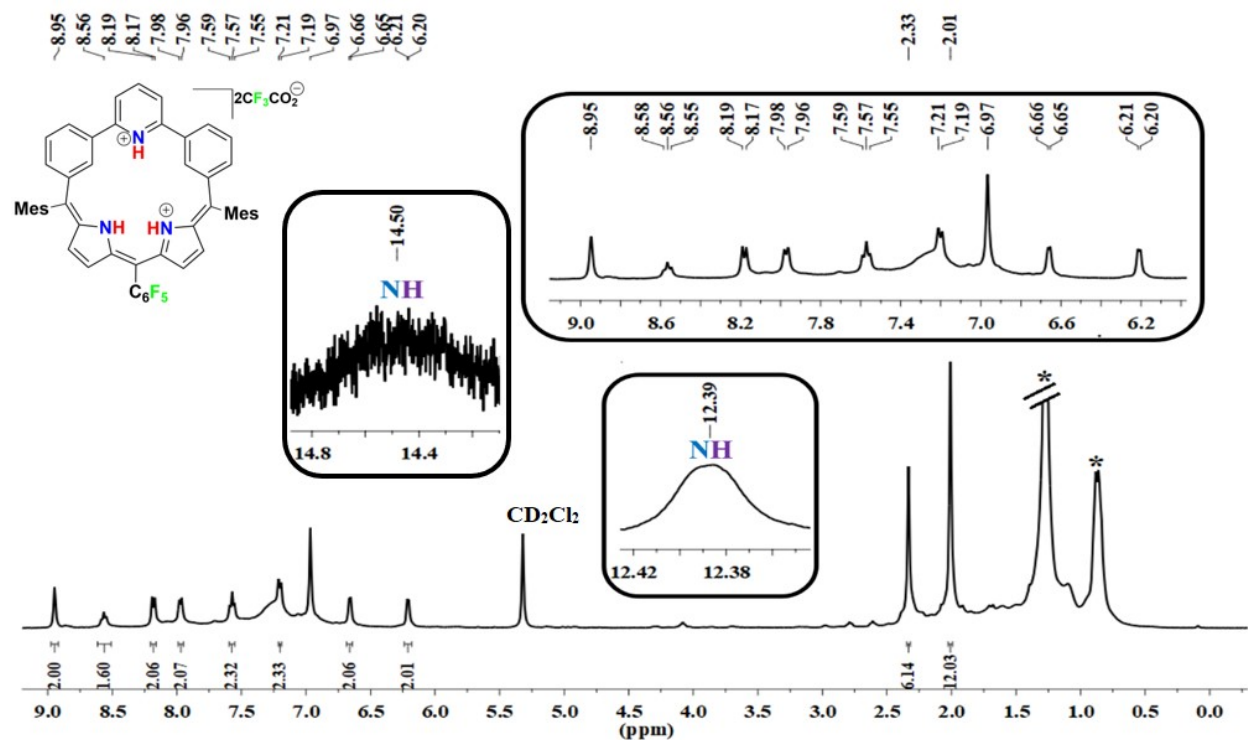

**Fig. S2**  $^1\text{H}$  NMR spectrum of  $\text{H}_2\text{S}_2^{2+} \cdot 2\text{CF}_3\text{CO}_2^-$  with 38 eq. of TFA in  $\text{CD}_2\text{Cl}_2$  at 298 K. (\*Residual solvents and impurity grease).

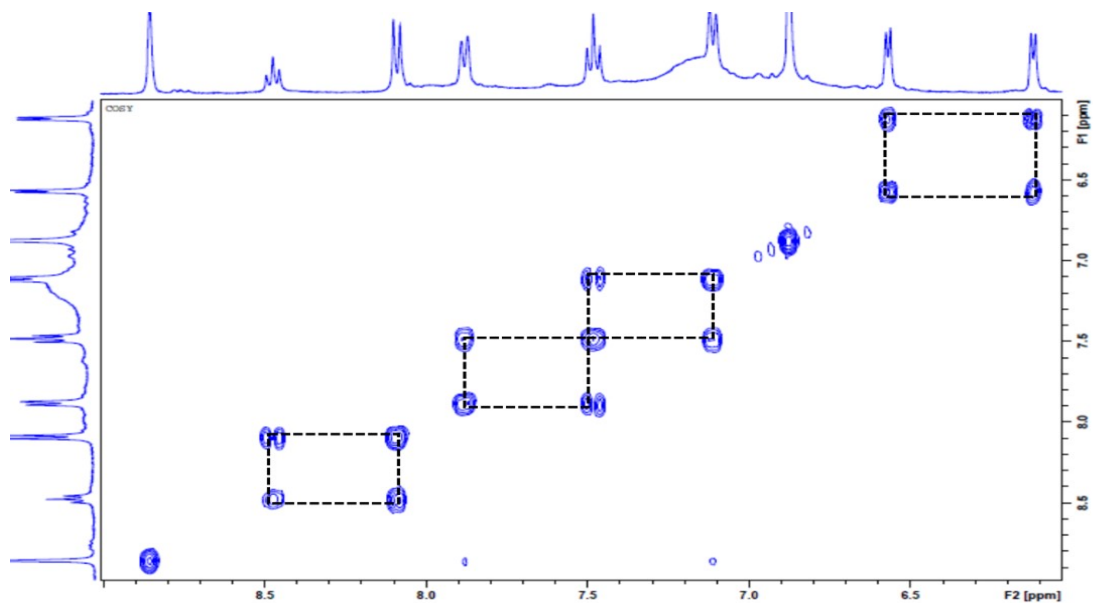

**Fig. S3**  $^1\text{H}$ - $^1\text{H}$  COSY spectrum of  $\text{H}_2\text{S}_2^{2+} \cdot 2\text{CF}_3\text{CO}_2^-$  with 38 eq. of TFA in  $\text{CD}_2\text{Cl}_2$  at 298 K.

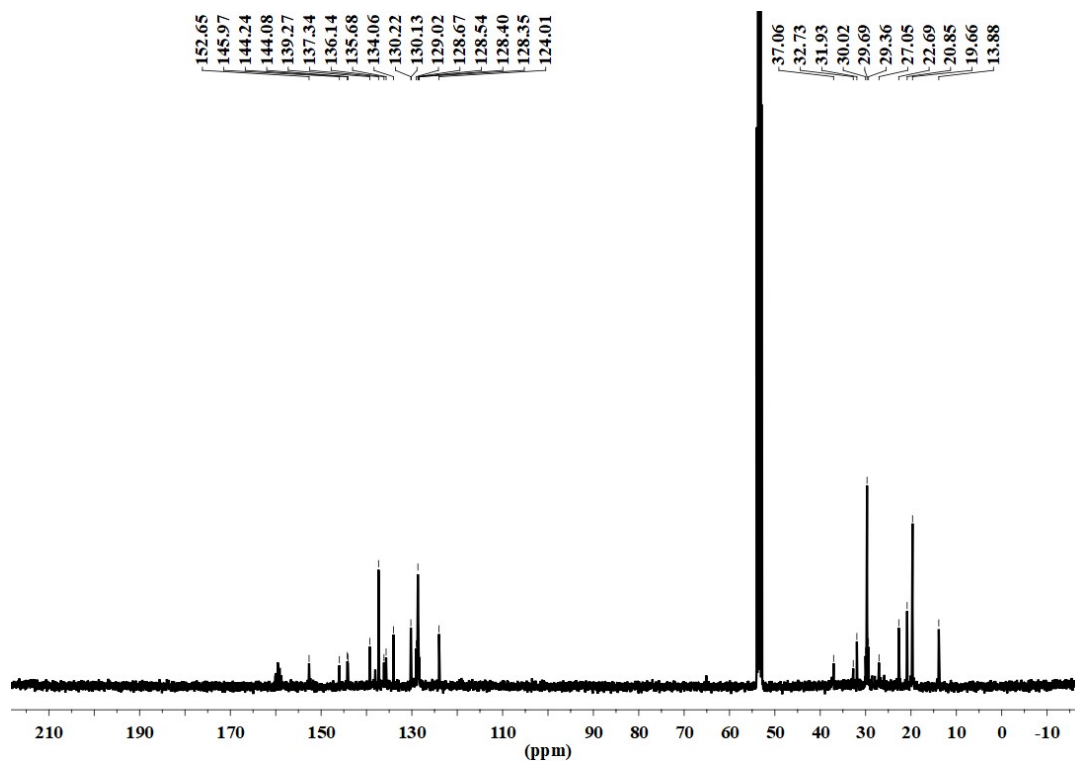

**Fig. S4**  $^{13}\text{C}$  NMR spectrum of  $\text{H}_2\text{S}_2^+ \cdot 2\text{CF}_3\text{CO}_2^-$  with 38 eq. of TFA in  $\text{CD}_2\text{Cl}_2$  at 298 K.

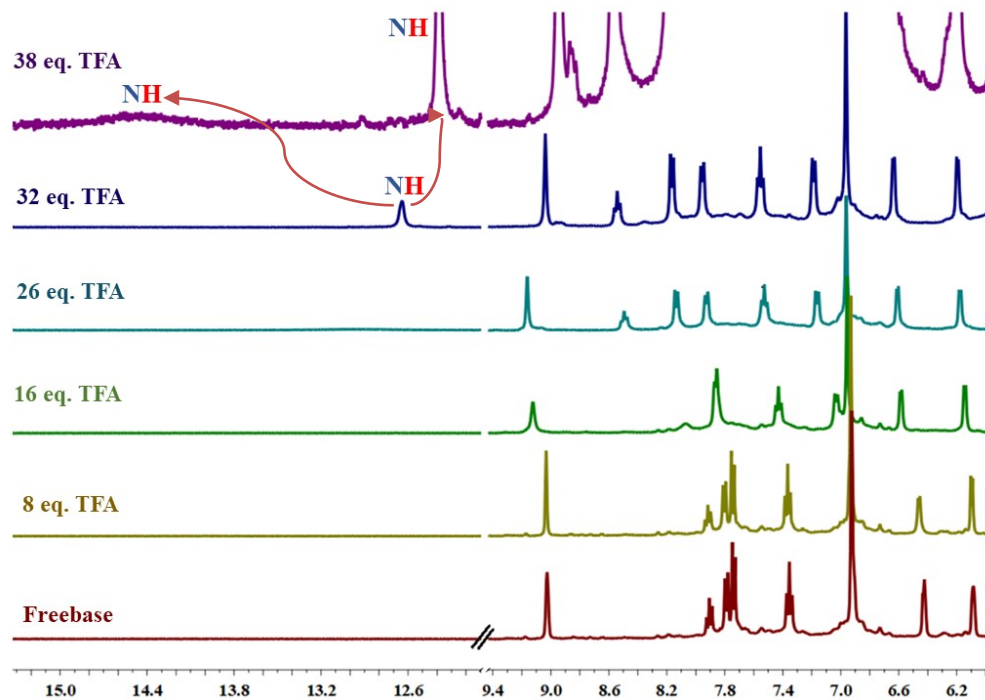

**Fig. S5**  $^1\text{H}$ -NMR spectra of  $\text{H}_2\text{S}_2^+ \cdot 2\text{CF}_3\text{CO}_2^-$  with increasing concentration of TFA in  $\text{CD}_2\text{Cl}_2$  at 298 K.

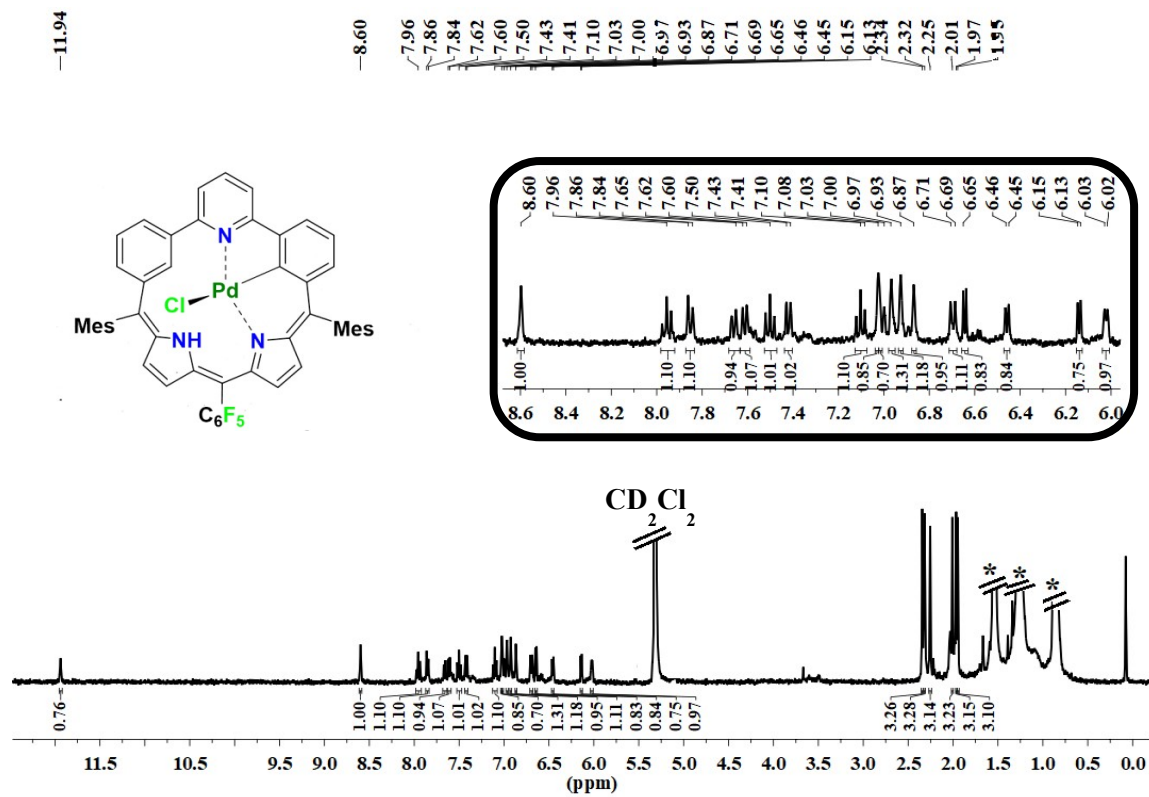

Fig. S6 <sup>1</sup>H-NMR spectrum of **8** in CD<sub>2</sub>Cl<sub>2</sub> at 298 K. (\*Residual solvents and impurity grease).

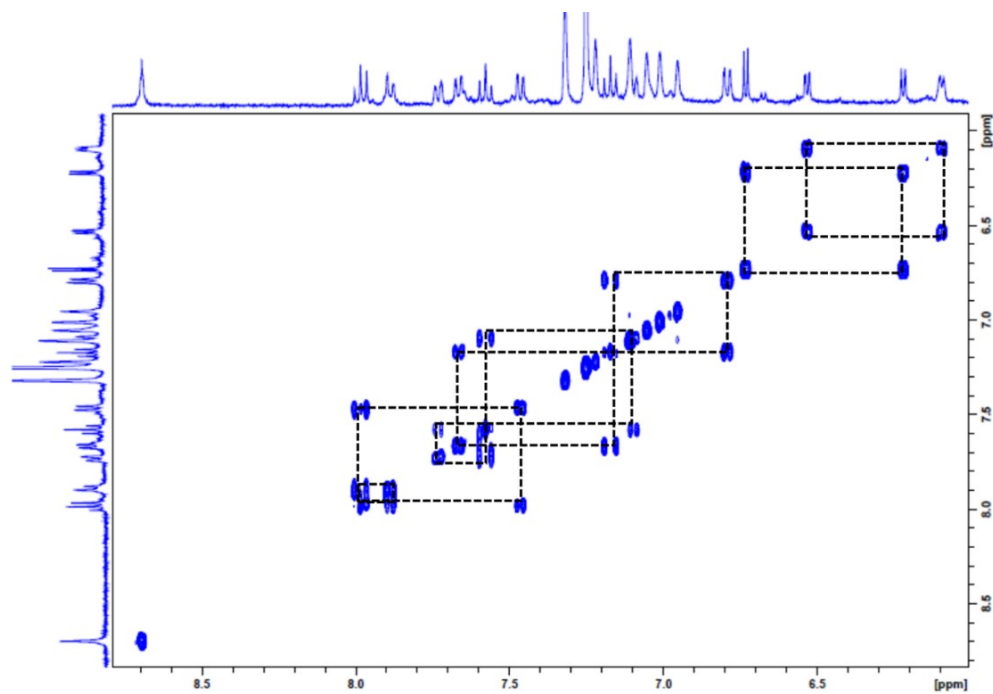

Fig. S7 <sup>1</sup>H-<sup>1</sup>H COSY spectrum of **8** in CD<sub>2</sub>Cl<sub>2</sub> at 298 K.

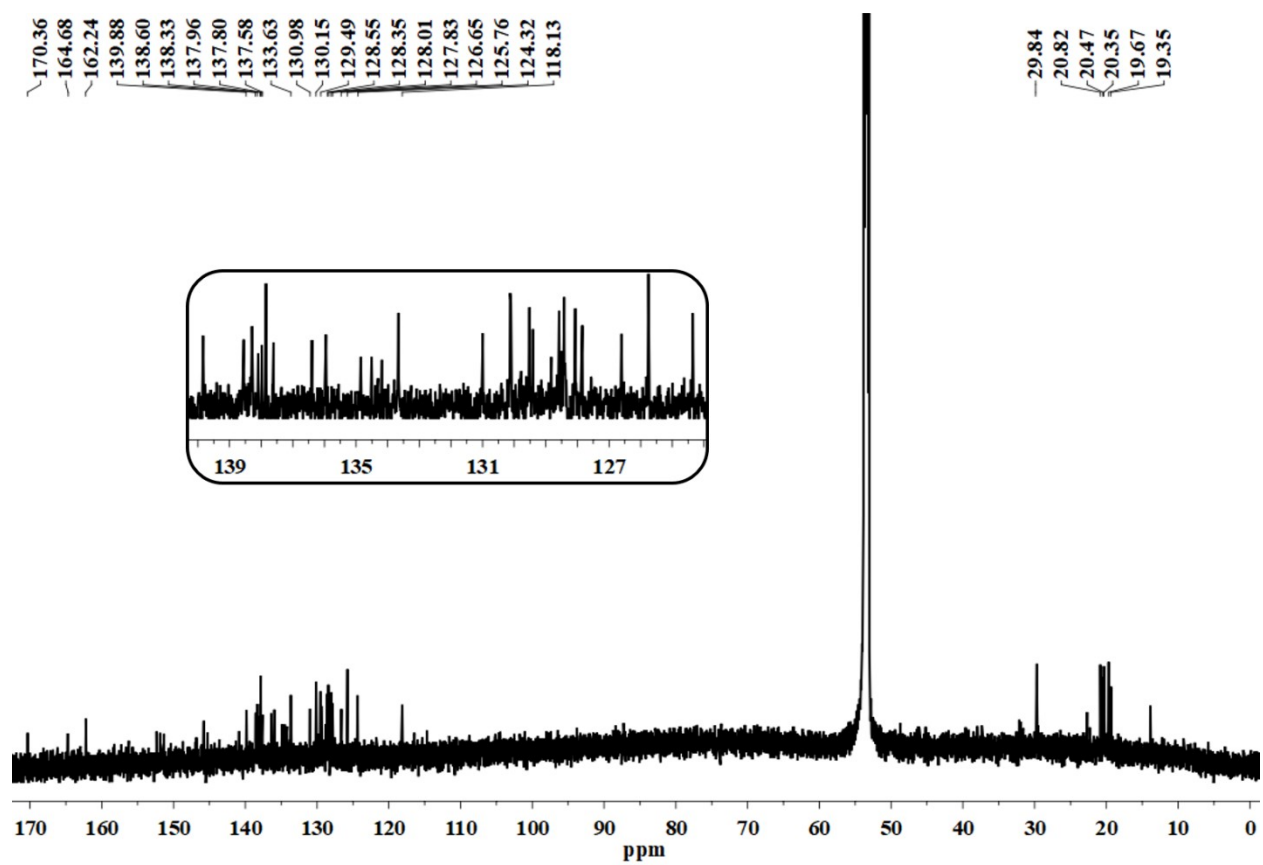

Fig. S8  $^{13}\text{C}$ -NMR spectrum of **8** in  $\text{CD}_2\text{Cl}_2$  at 298 K.

### 3. Single crystal X-ray structural analyses of $\text{H}_2\text{5}^{2+} \cdot 2\text{CF}_3\text{CO}_2^-$ and **8**:

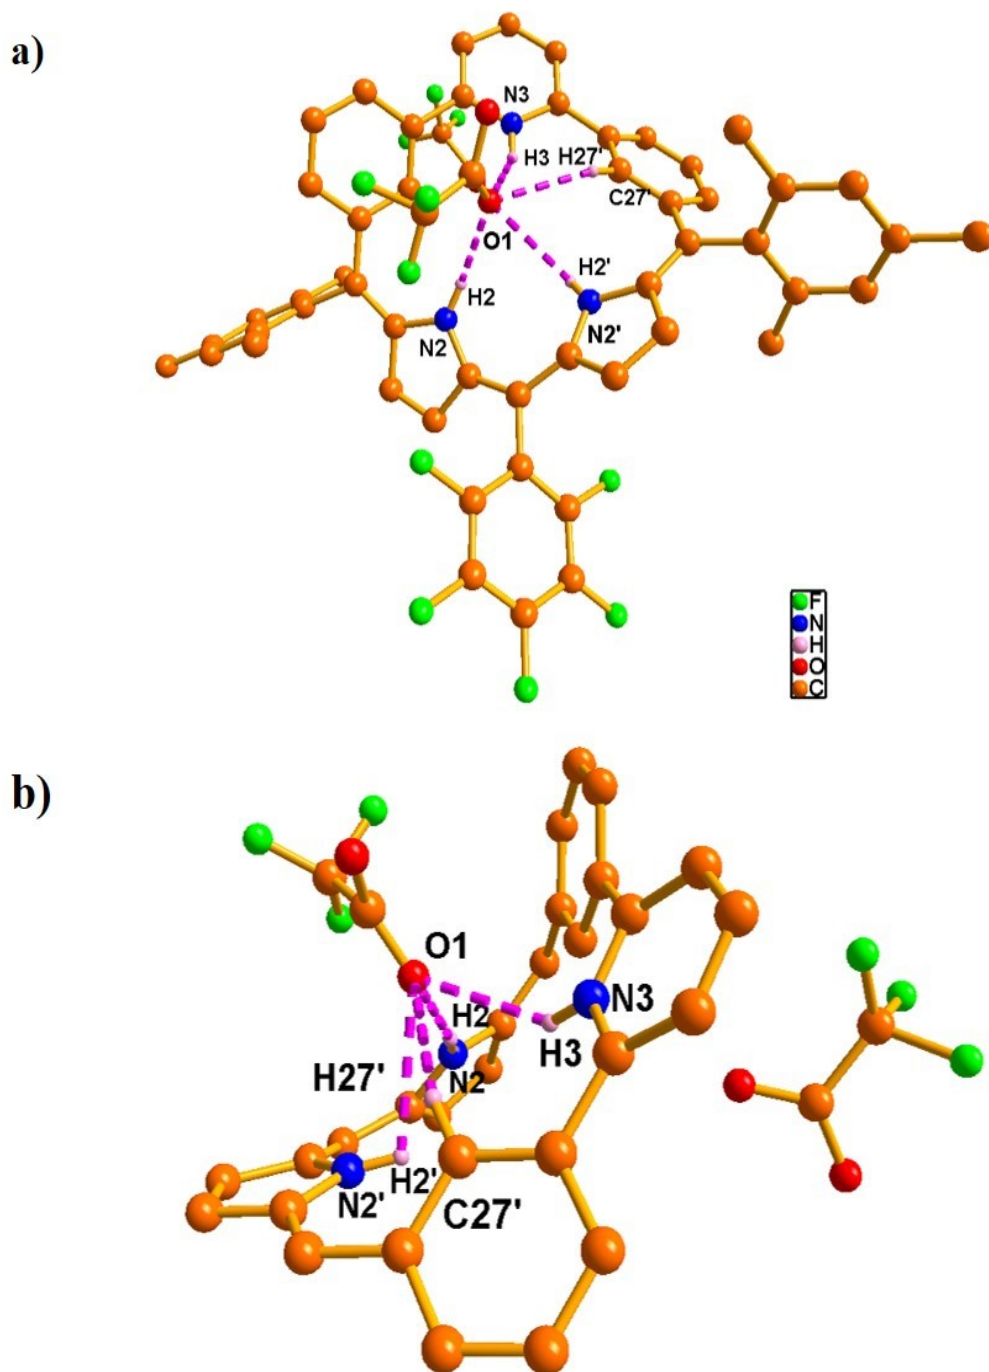

**Fig. S9** Single crystal X-ray structure of  $\text{H}_2\text{5}^{2+} \cdot 2\text{CF}_3\text{CO}_2^-$ . a) Top view and b) side view. Peripheral H-atoms in a) & b) and *meso*-aryl groups in b) are omitted for clarity.

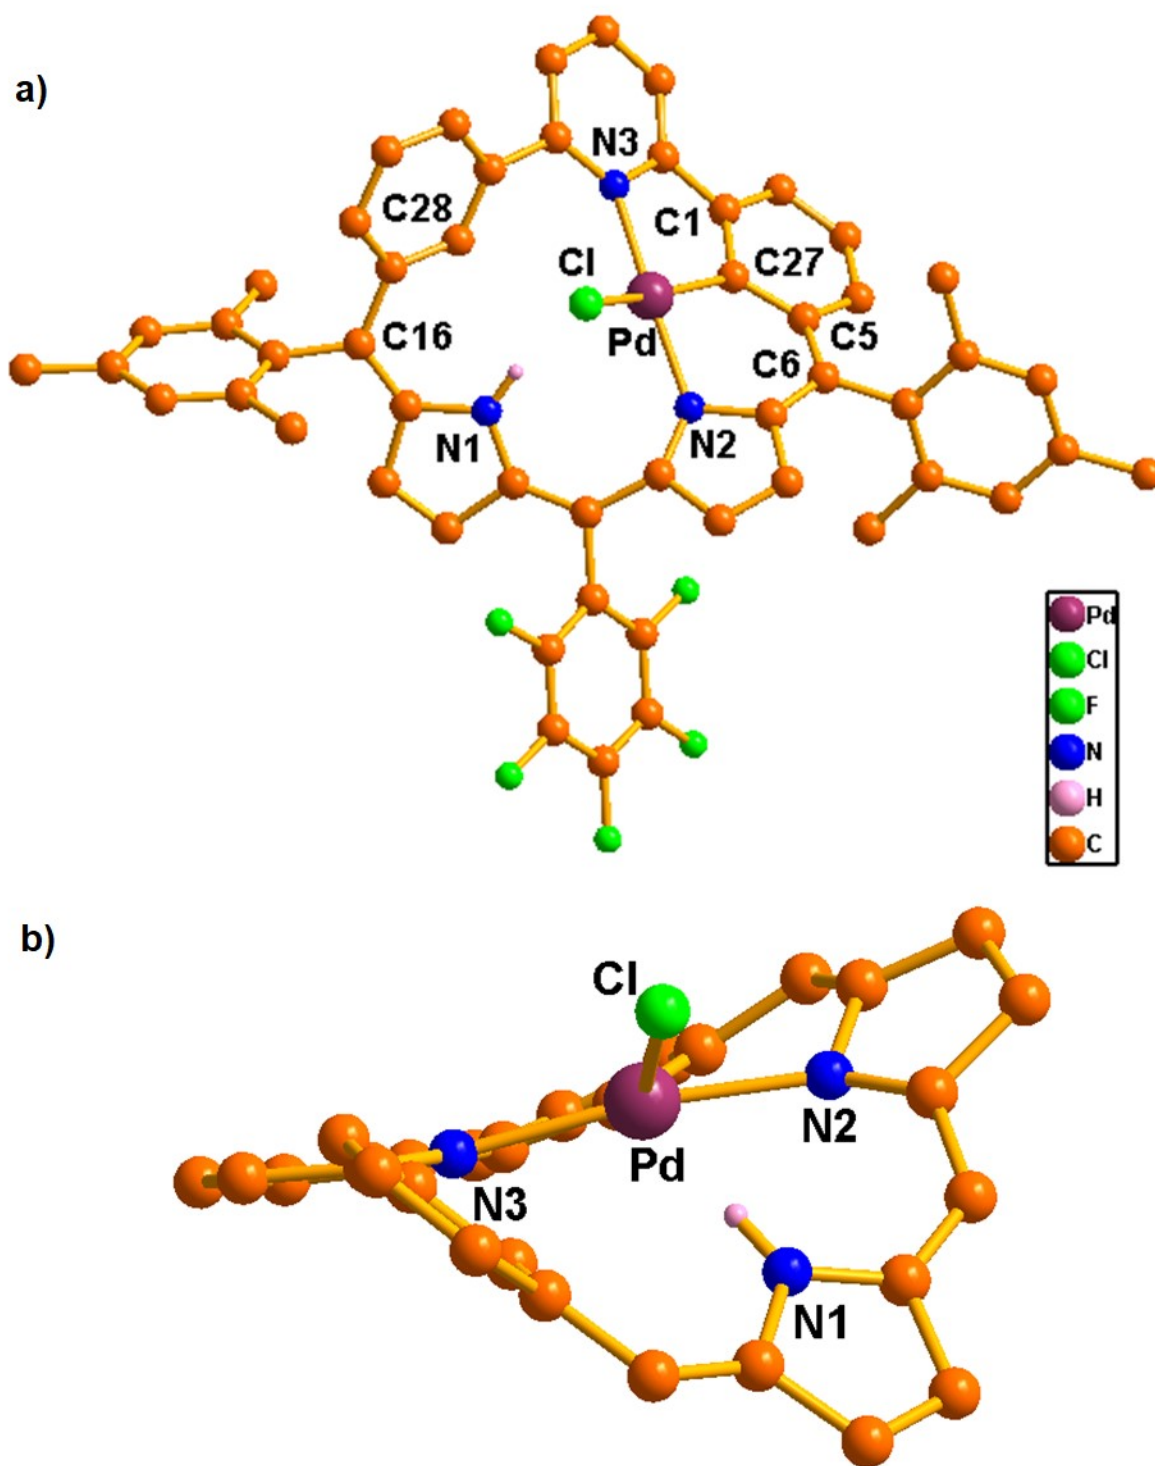

**Fig. S10** Single crystal X-ray structure of **8**. a) Top view and b) side view. Peripheral H-atoms in a) & b) and *meso*-aryl groups in b) are omitted for clarity.



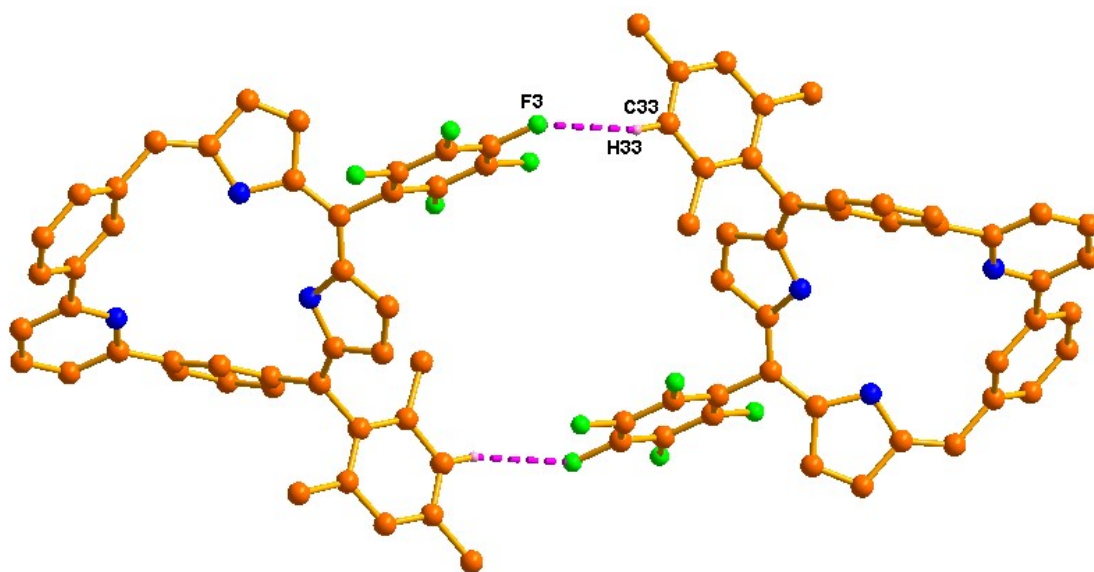

**Fig. S11** Self-assembled dimer in  $\text{H}_2\mathbf{5}^{2+} \cdot 2\text{CF}_3\text{CO}_2^-$ . The bond distance and angle are: C33-H33...F3: 2.753(2) Å & 167.02(3)°. The hydrogen atoms and the *meso*-aryl groups are omitted for clarity.

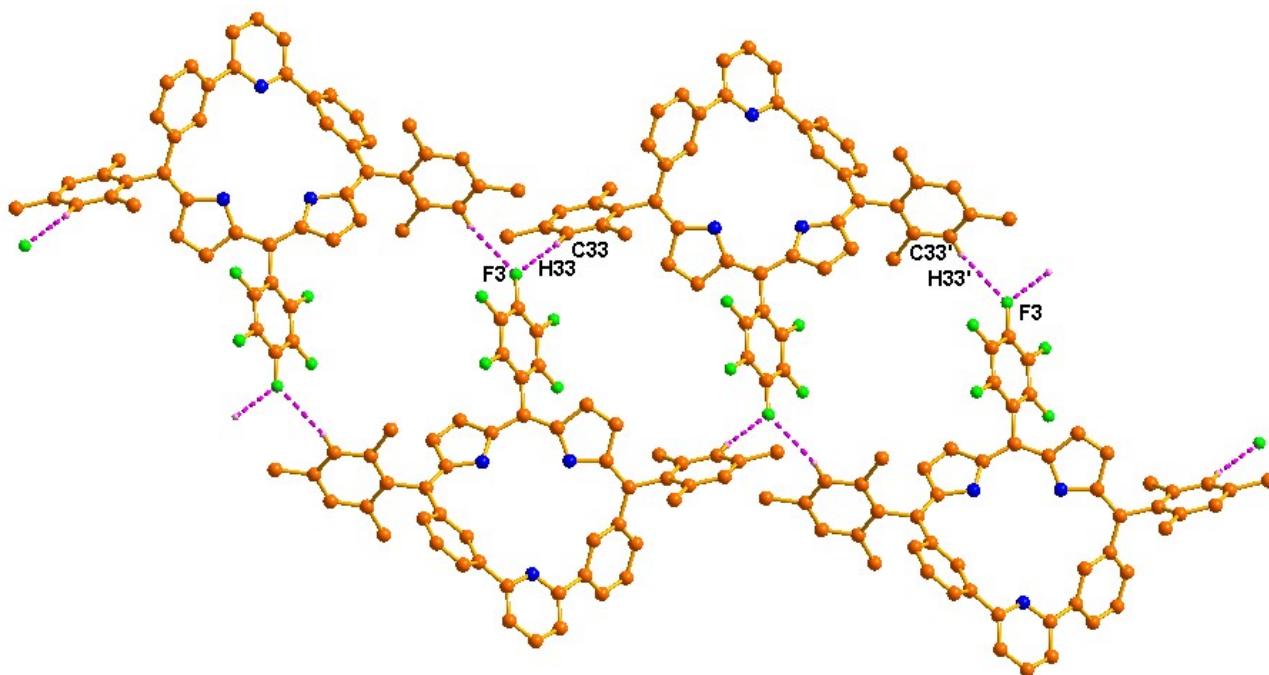

**Fig. S12** Single crystal X-ray analysis of  $\text{H}_2\mathbf{5}^{2+} \cdot 2\text{CF}_3\text{CO}_2^-$  in 2-D array. The bond distances and angles are C33-H33...F3: 2.753(2) Å and 167.02(3)° ; C33'-H33'...F3: 2.753(2) Å and 167.02(3)° respectively. The hydrogen atoms and the *meso*-aryl groups are omitted for clarity.

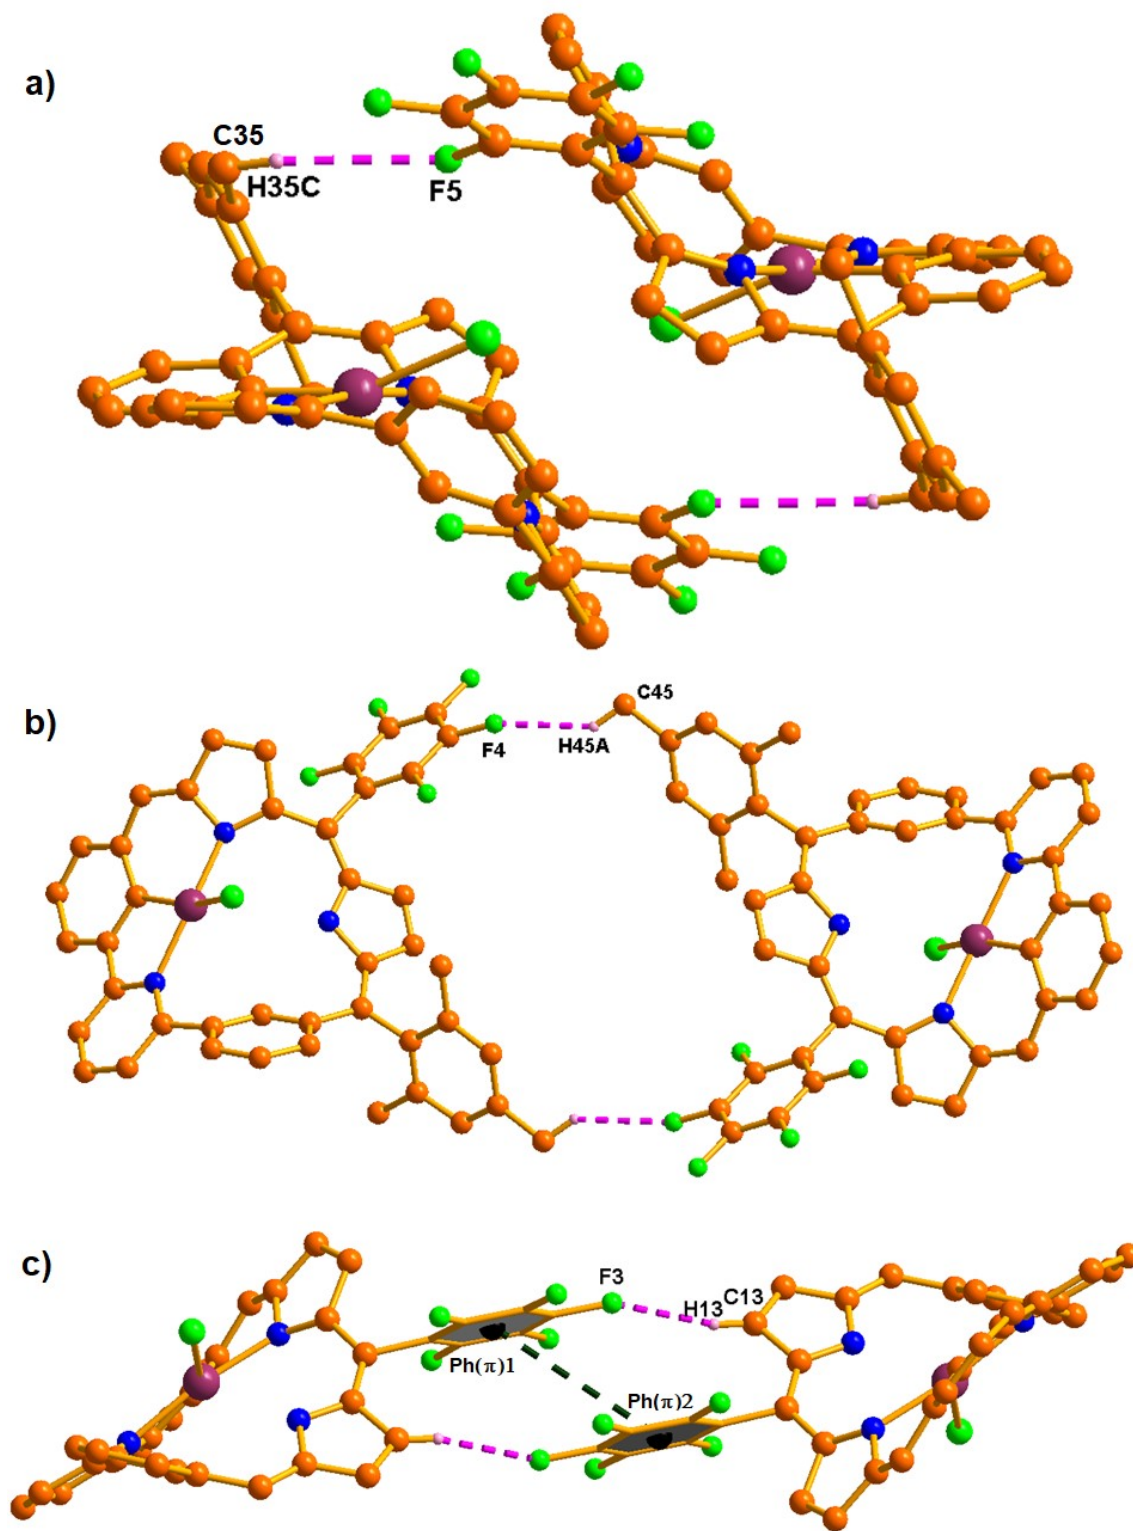

**Fig. S13.** Single crystal X-ray analysis of **8**. a), b) and c) are Self-assembled dimers. The bond distances and angles are: a) C35-H35C...F5: 2.859(2) Å & 154.74(4)°; b) C45-H45...F4: 2.559(3) Å & 144.02(4)° ; c) C13-H13...F3: 2.566(4) Å and 159.7(4)°; Ph( $\pi$ )1-Ph( $\pi$ )2: 4.47(1) Å respectively. The hydrogen atoms and the *meso*-aryl groups are omitted for clarity.

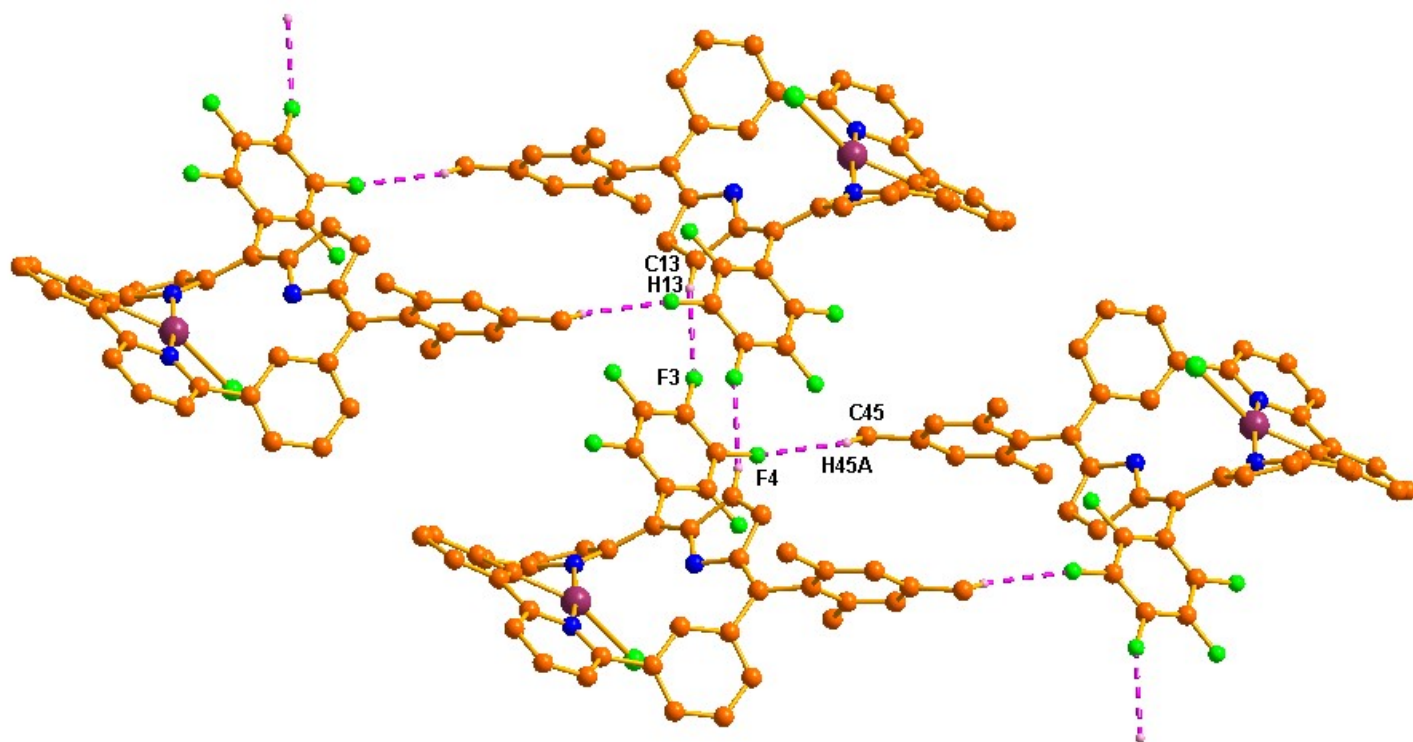

**Fig. S14** Single crystal X-ray analysis of **8** in 2-D array. The bond distances and angles are C13-H13...F3: 2.567(4) Å and 159.69(4)°; C45-H45A...F4: 2.559(3) Å and 144.02(4)° respectively. The hydrogen atoms and the *meso*-aryl groups are omitted for clarity.

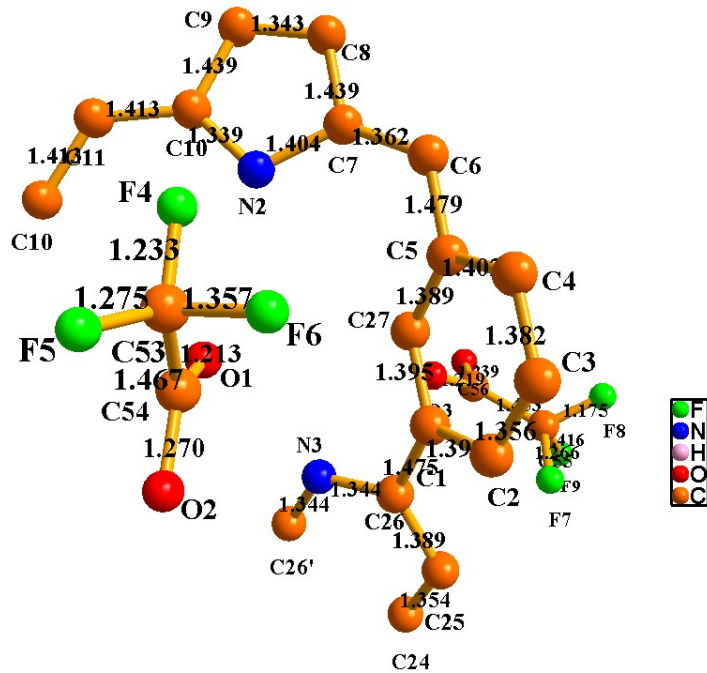

Fig. S15 Bond Lengths in  $\text{H}_2.5^{2+} \cdot 2\text{CF}_3\text{CO}_2^-$  (Å).

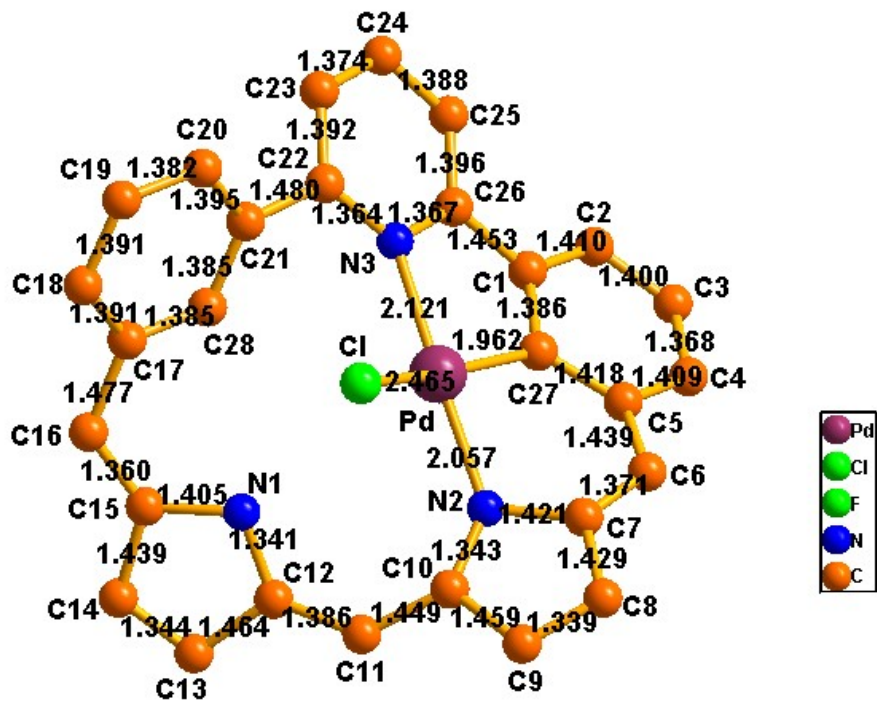

Fig. S16 Bond Lengths in  $\mathbf{8}$  (Å).

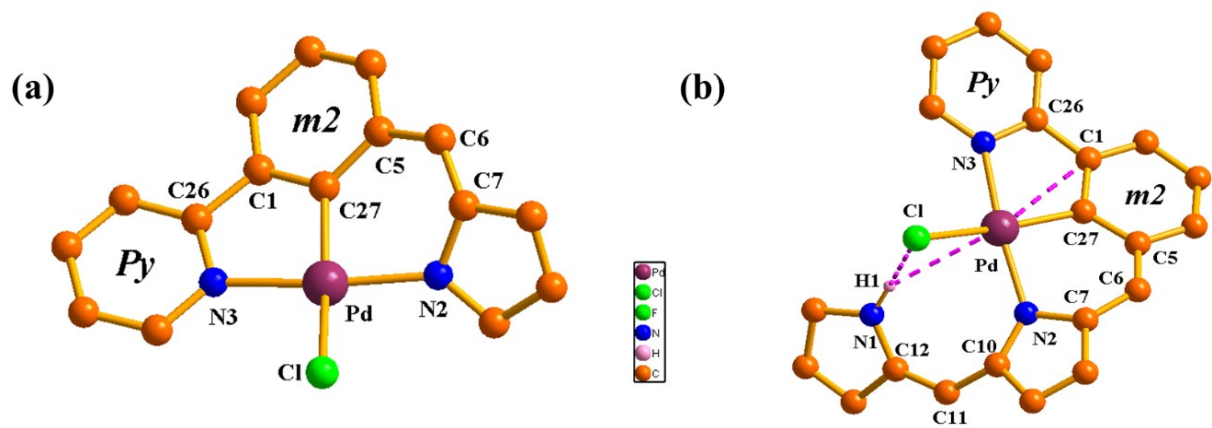

**Fig. S17** (a) Organo-Pd(II) pincer type complex and (b) intramolecular hydrogen bonding and metal–arene interactions in **8**.

**Table S1:** Crystal data for  $\text{H}_2\text{S}^{2+} \cdot 2\text{CF}_3\text{CO}_2^-$  and **8**

| Crystal parameters                                    | $\text{H}_2\text{S}^{2+} \cdot 2\text{CF}_3\text{CO}_2^-$     | <b>8</b>                                                    |
|-------------------------------------------------------|---------------------------------------------------------------|-------------------------------------------------------------|
| Formula                                               | $\text{C}_{60}\text{H}_{40}\text{F}_{17}\text{N}_3\text{O}_8$ | $\text{C}_{52}\text{H}_{37}\text{ClF}_5\text{N}_3\text{Pd}$ |
| $M/\text{g mol}^{-1}$                                 | 1253.95                                                       | 940.70                                                      |
| $T/\text{K}$                                          | 293(2)                                                        | 112.6(5)                                                    |
| Crystal dimensions/ $\text{mm}^3$                     | $0.2 \times 0.1 \times 0.1$                                   | $0.362 \times 0.28 \times 0.22$                             |
| Crystal system                                        | monoclinic                                                    | triclinic                                                   |
| Space group                                           | $C2/c$                                                        | $P-1$                                                       |
| $a/\text{\AA}$                                        | 17.3774(4)                                                    | 12.7701(2)                                                  |
| $b/\text{\AA}$                                        | 19.4464(3)                                                    | 13.7846(2)                                                  |
| $c/\text{\AA}$                                        | 20.1641(4)                                                    | 14.2357(2)                                                  |
| $\alpha/^\circ$                                       | 90                                                            | 92.4420(10)                                                 |
| $\beta/^\circ$                                        | 97.8318(19)                                                   | 111.581(2)                                                  |
| $\gamma/^\circ$                                       | 90                                                            | 102.638(2)                                                  |
| $V/\text{\AA}^3$                                      | 6750.4(2)                                                     | 2252.78(7)                                                  |
| $Z$                                                   | 4                                                             | 2                                                           |
| $\rho_{\text{calcd}}/\text{mg m}^{-3}$                | 1.443                                                         | 1.494                                                       |
| $\mu/\text{mm}^{-1}$                                  | 2.860                                                         | 4.938                                                       |
| $F(000)$                                              | 2552                                                          | 1033                                                        |
| Reflns. collected                                     | 45950                                                         | 31042                                                       |
| Indep.reflns.[ $R(\text{int})$ ]                      | 5733 [0.0796]                                                 | 8219 [0.1376]                                               |
| Max/min transmission                                  | 0.751, 0.745                                                  | 1.000, 0.325                                                |
| Data/restraints/parameters                            | 5733/210/531                                                  | 8219/0/565                                                  |
| GOF on $F^2$                                          | 1.050                                                         | 1.130                                                       |
| Final R indices [ $I > 2\sigma(I)$ ]                  | $R1 = 0.0732,$<br>$wR2 = 0.2160$                              | $R1 = 0.0945,$<br>$wR2 = 0.2425$                            |
| R indices (all data)                                  | $R1 = 0.0784,$<br>$wR2 = 0.2201$                              | $R1 = 0.0966,$<br>$wR2 = 0.2454$                            |
| Largest diff peak and hole<br>[ $e \text{\AA}^{-3}$ ] | 0.23 and -0.232                                               | 4.20 and -2.01                                              |

The crystals have been deposited in the Cambridge Crystallographic Data Centre with reference no. **CCDC 1957038** ( $\text{H}_2\text{S}^{2+} \cdot 2\text{CF}_3\text{CO}_2^-$ ) and **CCDC 2238652** (**8**). These data can be obtained free of charge from the Cambridge Crystallographic Data Centre via [www.ccdc.cam.ac.uk/data\\_request/cif](http://www.ccdc.cam.ac.uk/data_request/cif).

#### 4. Electronic absorption spectral analysis

**Table S2.** Electronic absorption spectral data for  $\text{H}_2\mathbf{5}^{2+} \cdot 2\text{CF}_3\text{CO}_2^-$  and **8** (concentration  $\approx 10^{-6}$  M)

| <b>Compd.</b>                                               | <b><math>\lambda_{\text{max}}/\text{nm}</math> (<math>\epsilon[\text{M}^{-1}\text{cm}^{-1}]\times 10^4</math>)</b> |
|-------------------------------------------------------------|--------------------------------------------------------------------------------------------------------------------|
| $\text{H}_2\mathbf{5}^{2+} \cdot 2\text{CF}_3\text{CO}_2^-$ | 344 (4.56), 615 (3.39), 659 (4.37)                                                                                 |
| <b>8</b>                                                    | 312 (2.41), 378 (2.54), 460 (0.50), 620 (1.80), 673 (2.58)                                                         |

## 5. Theoretical Calculations:

Computational calculations were performed with Becke's three-parameter hybrid exchange functional and the Lee–Yang–Parr correlation functional (B3LYP)<sup>[1, 2]</sup> and the 6-31G(d) basis set for all atoms except the palladium metal, and the CEP-31G (Stevens/Basch/Krauss ECP) for palladium metal.

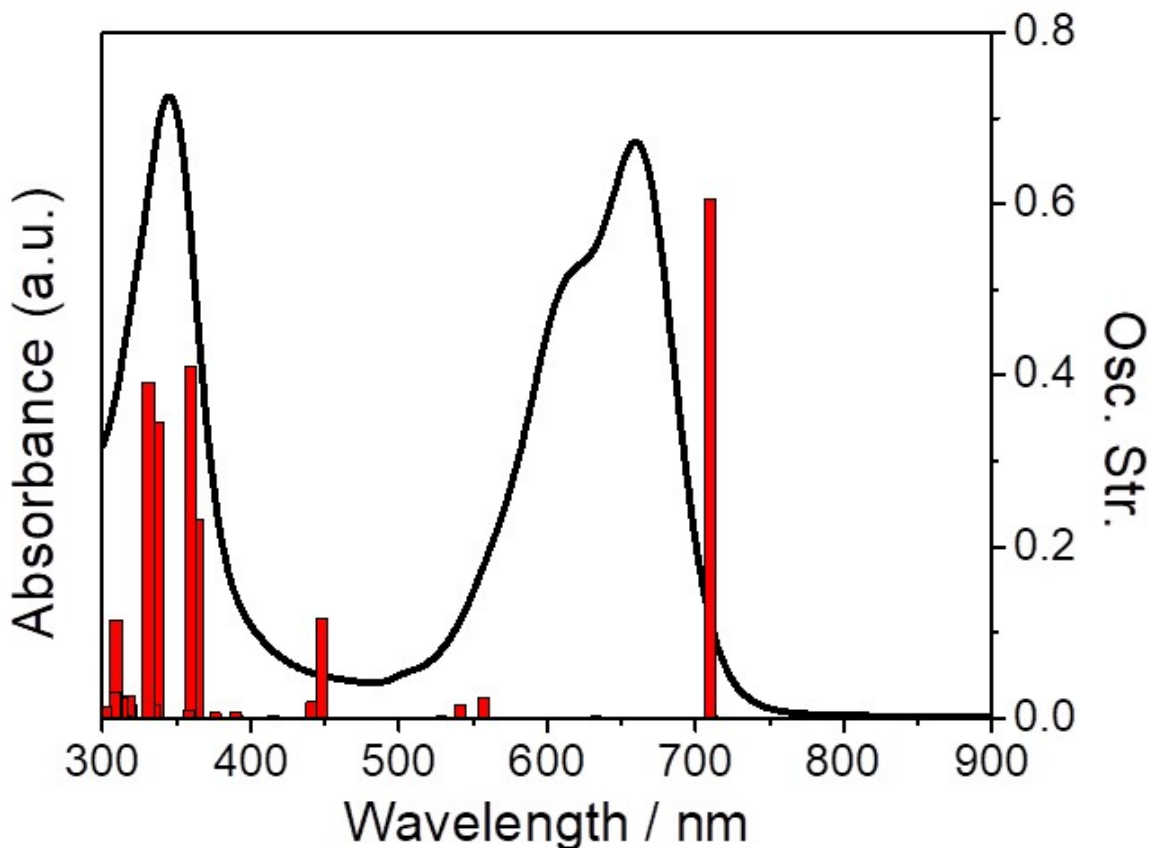

**Fig. S18** Absorption spectrum of H<sub>2</sub>S<sup>2+</sup>.2CF<sub>3</sub>CO<sub>2</sub><sup>-</sup> along with the calculated vertical transitions (red) obtained by TD-DFT (B3LYP/6-31g(d)) method.

**Table S3.** Selected TD-DFT calculated energies, oscillator strengths and compositions of the major electronic transitions of H<sub>2</sub>S<sup>2+</sup>.2CF<sub>3</sub>CO<sub>2</sub><sup>-</sup>. The terms H and L refer to HOMO and LUMO, respectively.

| Energy (cm <sup>-1</sup> ) | Wavelength (nm) | Osc. Strength | Major Transitions |
|----------------------------|-----------------|---------------|-------------------|
| 14079                      | 710             | 0.6065        | H → L (93%)       |
| 22338                      | 448             | 0.1155        | H → L+3 (87%)     |
| 27468                      | 364             | 0.2307        | H-7 → L+1 (95%)   |
| 30219                      | 331             | 0.3916        | H-8 → L+1 (91%)   |



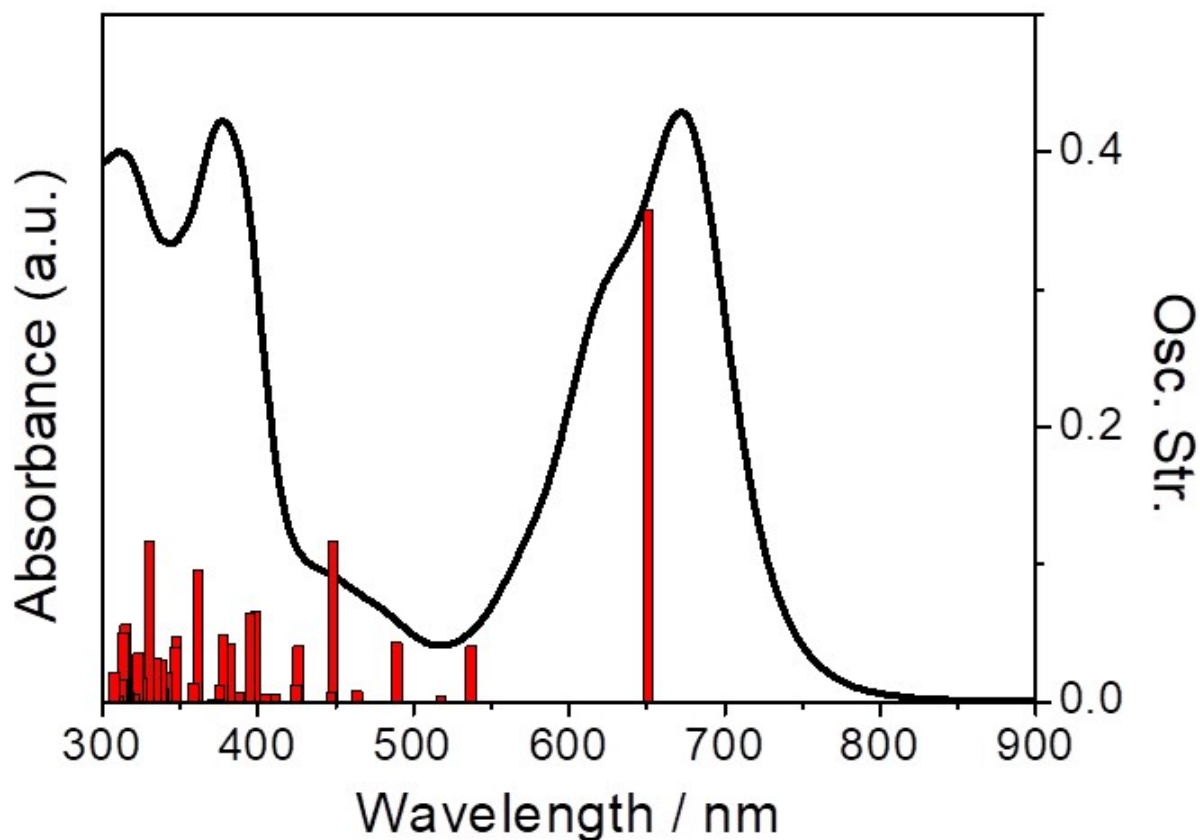

**Fig. S19** Absorption spectrum of **8** along with the calculated vertical transitions (red) obtained by TD-DFT (B3LYP/6-31g(d)) method.

**Table S4.** Selected TD-DFT calculated energies, oscillator strengths and compositions of the major electronic transitions of **8**. The terms H and L refer to HOMO and LUMO, respectively.

| Energy (cm <sup>-1</sup> ) | Wavelength (nm) | Osc. Strength | Major Transitions            |
|----------------------------|-----------------|---------------|------------------------------|
| 15362                      | 651             | 0.3574        | H → L (95%)                  |
| 22308                      | 448             | 0.1162        | H-4 → L (23%), H → L+2 (58%) |
| 25086                      | 399             | 0.0653        | H-5 → L (28%), H-4 → L (21%) |

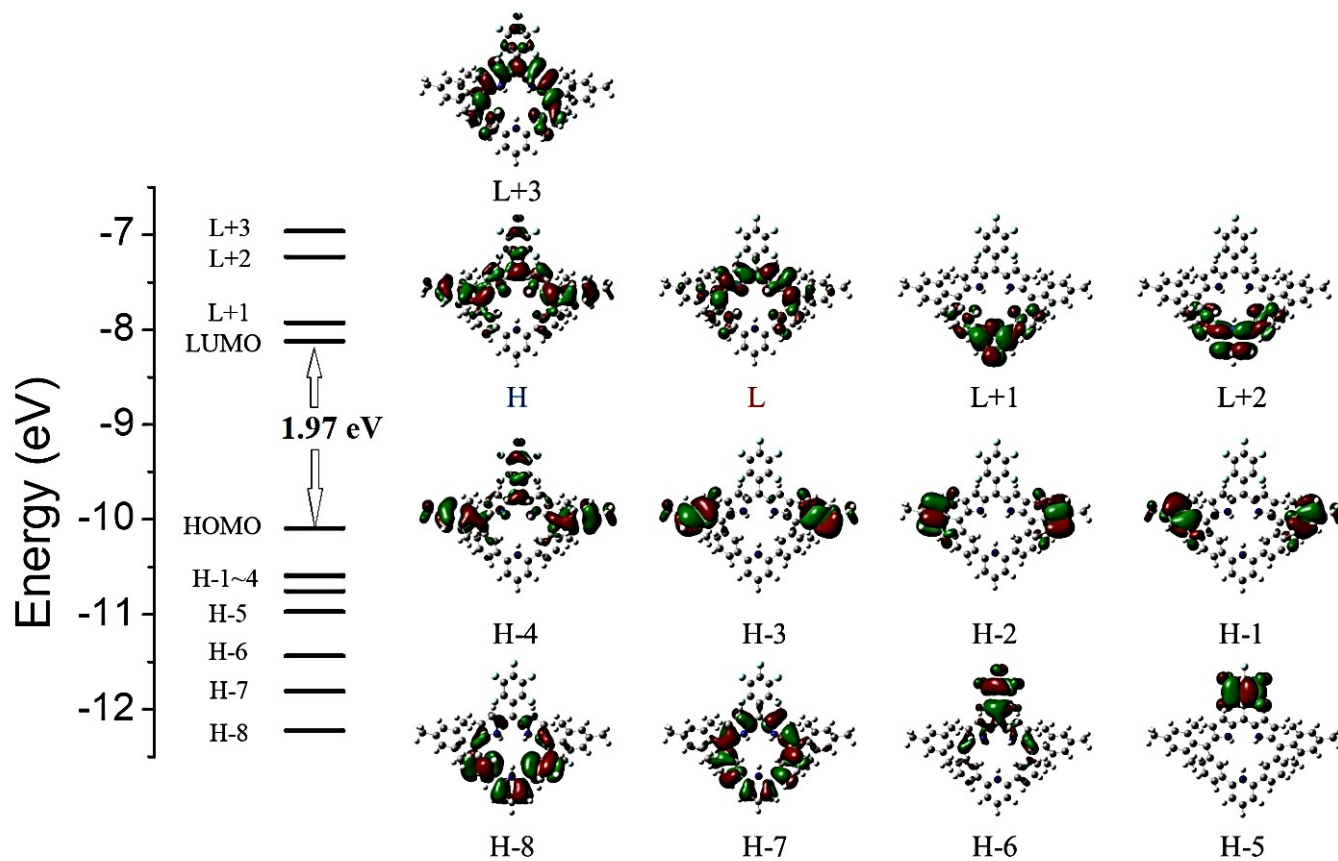

**Fig. S20** Molecular orbital energy diagrams of  $\text{H}_2\text{S}^{2+} \cdot 2\text{CF}_3\text{CO}_2^-$  obtained from DFT calculation (B3LYP/6-31g(d)) method.

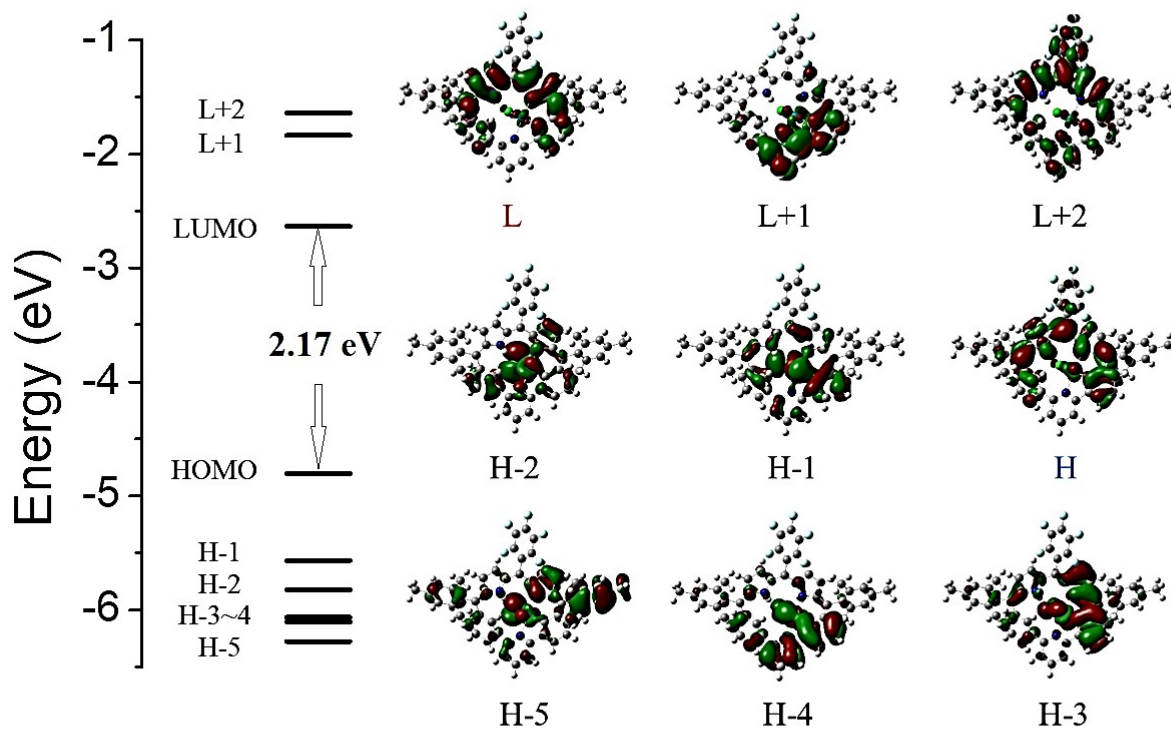

**Fig. S21** Molecular orbital energy diagrams of **8** obtained from DFT calculation (B3LYP/6-31g(d)) method.

**Optimized structure of molecules at B3LYP/6-31G(d) level. All the X, Y, Z coordinates are given in Å.**

**Atoms and their X, Y, Z Coordinates of  $\text{H}_2\text{5}^{2+} \cdot 2\text{CF}_3\text{CO}_2^-$ :**

**Structure  $\text{H}_2\text{5}^{2+} \cdot 2\text{CF}_3\text{CO}_2^-$**

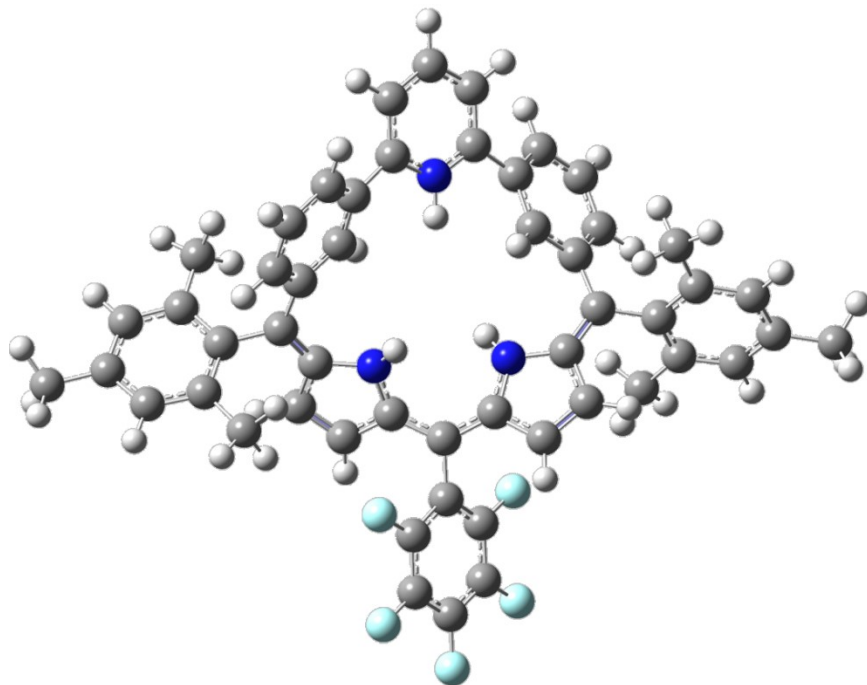

**Fig. S22** Optimized structure of  $\text{H}_2\text{5}^{2+} \cdot 2\text{CF}_3\text{CO}_2^-$  at B3LYP/6-31G(d) level.

**All the X, Y, Z coordinates are given in Å.**

|   |          |          |          |
|---|----------|----------|----------|
| F | 1.95103  | 3.75936  | 1.35244  |
| N | 1.6549   | 0.3043   | -0.05728 |
| H | 1.30212  | -0.15069 | 0.77557  |
| N | 0.00009  | -4.26267 | -0.00003 |
| H | 0.00007  | -3.24751 | -0.00001 |
| F | -0.00017 | 7.81646  | -0.00006 |
| F | 1.948    | 6.45589  | 1.33633  |
| C | -0.00005 | 2.1769   | 0.0000   |
| C | -0.00008 | 3.66464  | -0.00002 |

|   |          |          |          |
|---|----------|----------|----------|
| C | 3.56895  | -2.00276 | 0.69728  |
| C | 1.1881   | 1.54942  | -0.43293 |
| C | 3.01781  | 0.18057  | -0.43272 |
| C | 3.93061  | -0.75919 | -0.01438 |
| C | 2.4753   | -2.79558 | 0.31387  |
| H | 1.90386  | -2.49322 | -0.56087 |
| C | 5.37908  | -0.47044 | -0.21747 |
| C | 1.11101  | -4.88032 | 0.49175  |
| C | 3.29982  | 1.33574  | -1.24642 |
| H | 4.22989  | 1.47958  | -1.77799 |
| C | 0.98536  | 4.40203  | 0.67671  |
| C | 2.21939  | -4.02685 | 0.9434   |
| C | 2.21229  | 2.15519  | -1.24123 |
| H | 2.09529  | 3.0939   | -1.76339 |
| C | 6.14572  | -1.28524 | -1.09099 |
| C | 4.39547  | -2.46652 | 1.74248  |
| H | 5.25571  | -1.87436 | 2.03578  |
| C | 5.99501  | 0.59745  | 0.48521  |
| C | 0.99863  | 5.79302  | 0.68069  |
| C | 3.04895  | -4.45652 | 1.99367  |
| H | 2.84323  | -5.38939 | 2.50892  |
| C | 1.10901  | -6.27404 | 0.49498  |
| H | 1.98159  | -6.80895 | 0.84895  |
| C | 7.49765  | -0.99585 | -1.26611 |
| H | 8.07816  | -1.605   | -1.95502 |
| C | -0.00014 | 6.49142  | -0.00004 |
| C | 7.36069  | 0.82577  | 0.28868  |
| H | 7.83933  | 1.62858  | 0.84402  |

|   |          |          |          |
|---|----------|----------|----------|
| C | 0.00014  | -6.96216 | -0.00008 |
| H | 0.00017  | -8.04792 | -0.0001  |
| C | 5.52665  | -2.42624 | -1.86872 |
| H | 5.27823  | -3.27599 | -1.22072 |
| H | 6.21936  | -2.79199 | -2.631   |
| H | 4.60426  | -2.12284 | -2.37793 |
| C | 8.1298   | 0.05472  | -0.58716 |
| C | 4.12598  | -3.6685  | 2.3917   |
| H | 4.76271  | -3.99763 | 3.20664  |
| C | 5.25323  | 1.46139  | 1.48745  |
| H | 4.64418  | 2.23711  | 1.00813  |
| H | 5.96364  | 1.97174  | 2.14307  |
| H | 4.58083  | 0.87522  | 2.12392  |
| C | 9.59206  | 0.34755  | -0.80906 |
| H | 10.17986 | -0.57432 | -0.86987 |
| H | 10.00552 | 0.96607  | -0.00757 |
| H | 9.74115  | 0.88726  | -1.75317 |
| F | -1.95119 | 3.75925  | -1.35246 |
| N | -1.65492 | 0.30424  | 0.05732  |
| H | -1.30213 | -0.15076 | -0.77552 |
| F | -1.94828 | 6.45577  | -1.33641 |
| C | -3.56888 | -2.00289 | -0.69725 |
| C | -1.18817 | 1.54938  | 0.43294  |
| C | -3.01782 | 0.18046  | 0.43277  |
| C | -3.93058 | -0.75935 | 0.01444  |
| C | -2.47519 | -2.79567 | -0.31387 |
| H | -1.90376 | -2.49331 | 0.56087  |
| C | -5.37906 | -0.47063 | 0.21751  |

|   |          |          |          |
|---|----------|----------|----------|
| C | -1.11081 | -4.88034 | -0.49182 |
| C | -3.29988 | 1.33564  | 1.24643  |
| H | -4.22996 | 1.47946  | 1.77799  |
| C | -0.98555 | 4.40198  | -0.67675 |
| C | -2.21923 | -4.02691 | -0.94345 |
| C | -2.21239 | 2.15513  | 1.24122  |
| H | -2.09542 | 3.09386  | 1.76335  |
| C | -6.14569 | -1.28538 | 1.0911   |
| C | -4.39538 | -2.46664 | -1.74247 |
| H | -5.25564 | -1.87451 | -2.03575 |
| C | -5.995   | 0.59722  | -0.48521 |
| C | -0.99887 | 5.79297  | -0.68076 |
| C | -3.04877 | -4.45657 | -1.99373 |
| H | -2.84301 | -5.38942 | -2.50901 |
| C | -1.10875 | -6.27407 | -0.49511 |
| H | -1.98131 | -6.809   | -0.8491  |
| C | -7.49761 | -0.99598 | 1.26623  |
| H | -8.07812 | -1.60509 | 1.95518  |
| C | -7.36069 | 0.82555  | -0.28867 |
| H | -7.83933 | 1.62833  | -0.84405 |
| C | -5.52658 | -2.42628 | 1.86895  |
| H | -5.27763 | -3.27588 | 1.22097  |
| H | -6.21948 | -2.79231 | 2.63092  |
| H | -4.60449 | -2.12263 | 2.37857  |
| C | -8.12978 | 0.05455  | 0.58722  |
| C | -4.12584 | -3.66859 | -2.39173 |
| H | -4.76255 | -3.99772 | -3.20668 |
| C | -5.25324 | 1.46111  | -1.48749 |

|   |           |         |          |
|---|-----------|---------|----------|
| H | -4.64421  | 2.23688 | -1.00821 |
| H | -5.96364  | 1.97141 | -2.14315 |
| H | -4.58081  | 0.87493 | -2.12392 |
| C | -9.59204  | 0.34737 | 0.80912  |
| H | -10.17991 | -0.5745 | 0.86935  |
| H | -10.00537 | 0.96635 | 0.00793  |
| H | -9.7412   | 0.88654 | 1.75352  |

### Atoms and their X, Y, Z Coordinates of 8:

#### Structure 8

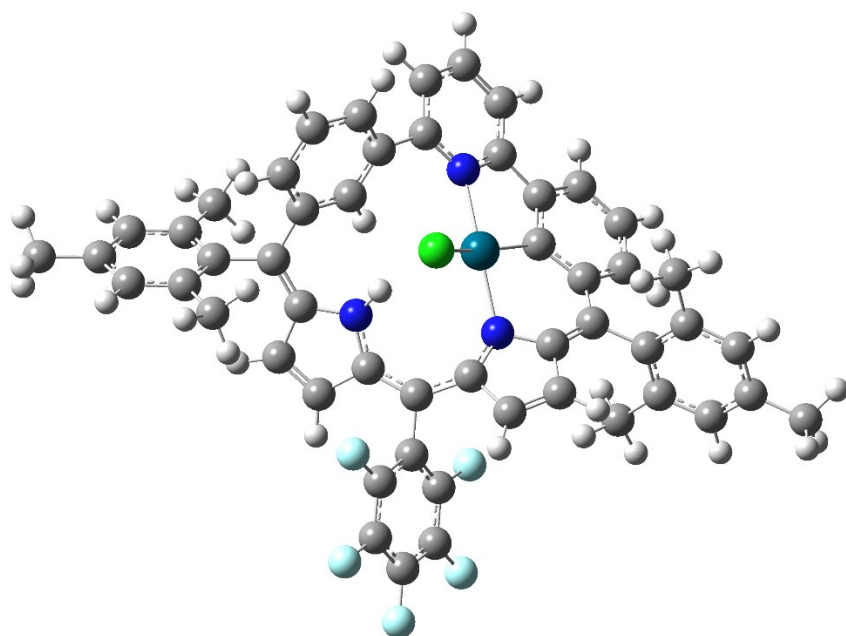

**Fig. S23** Optimized structure of **8** at B3LYP/6-31G(d) level.

All the X, Y, Z coordinates are given in Å.

|    |          |          |          |
|----|----------|----------|----------|
| Pd | 0.69409  | -1.73103 | -0.27902 |
| Cl | -0.61373 | -1.13581 | -2.30505 |
| F  | 1.88191  | 3.23224  | 1.72567  |
| F  | -1.40626 | 4.22489  | -1.55359 |
| F  | 0.9048   | 7.69686  | 0.61814  |

|   |          |          |          |
|---|----------|----------|----------|
| F | -0.96159 | 6.85557  | -1.18782 |
| F | 2.32186  | 5.86793  | 2.06628  |
| N | 1.58156  | 0.17243  | -0.30618 |
| N | -1.94681 | 0.57406  | -0.07735 |
| H | -1.58888 | -0.05058 | -0.81668 |
| N | -0.10869 | -3.69943 | 0.24848  |
| C | 2.21769  | -2.43317 | 0.77515  |
| C | 0.2188   | 3.62176  | 0.07181  |
| C | -1.5341  | -5.63773 | 0.19729  |
| H | -2.48433 | -6.06753 | -0.09641 |
| C | -2.28802 | 2.55862  | 0.95139  |
| H | -2.06817 | 3.51472  | 1.40329  |
| C | -3.29896 | 0.63019  | 0.2955   |
| C | -2.7712  | -2.30505 | -0.12805 |
| H | -2.1885  | -1.90464 | 0.69464  |
| C | -1.27961 | -4.29187 | -0.1031  |
| C | 2.22265  | 2.18686  | -1.20412 |
| H | 2.12606  | 3.19609  | -1.57741 |
| C | 1.16771  | 4.09698  | 0.98978  |
| C | -0.02443 | 2.15487  | -0.11683 |
| C | 0.78804  | -4.40935 | 0.99917  |
| C | 2.02872  | -3.71076 | 1.34476  |
| C | 3.87395  | -0.70124 | -0.01243 |
| C | 1.14272  | 1.43211  | -0.56726 |
| C | 3.32709  | 1.40866  | -1.21867 |
| H | 4.31407  | 1.65267  | -1.58408 |
| C | -4.6897  | -2.18655 | -1.59103 |
| H | -5.5854  | -1.67453 | -1.92919 |



|   |          |          |          |
|---|----------|----------|----------|
| C | -3.90649 | -1.61047 | -0.57384 |
| C | -4.30592 | -3.38856 | -2.18106 |
| H | -4.89801 | -3.8064  | -2.99039 |
| C | -0.4861  | 4.59365  | -0.65217 |
| C | -1.31256 | 1.74374  | 0.23415  |
| C | -2.39019 | -3.51648 | -0.70317 |
| C | 2.96421  | 0.17017  | -0.56233 |
| C | 4.52247  | -2.49902 | 1.56022  |
| H | 5.50964  | -2.05152 | 1.60271  |
| C | -0.60417 | -6.37648 | 0.91562  |
| H | -0.7925  | -7.41757 | 1.16211  |
| C | 3.5151   | -1.86684 | 0.79379  |
| C | 5.33158  | -0.39646 | -0.215   |
| C | 0.55546  | -5.74812 | 1.34068  |
| H | 1.29075  | -6.29422 | 1.91743  |
| C | 4.27591  | -3.68055 | 2.24879  |
| H | 5.05708  | -4.1336  | 2.85211  |
| C | -3.16255 | -4.05509 | -1.74372 |
| H | -2.85989 | -4.98456 | -2.2172  |
| C | 0.68562  | 6.39069  | 0.44199  |
| C | -5.70265 | 0.02535  | 0.23352  |
| C | 3.04344  | -4.31    | 2.1103   |
| H | 2.88448  | -5.27038 | 2.59076  |
| C | 1.40954  | 5.45472  | 1.17763  |
| C | -0.26801 | 5.95863  | -0.47596 |
| C | -8.44287 | 0.60247  | 0.63802  |
| C | -6.42546 | -0.63117 | 1.25882  |
| C | -3.46936 | 1.89436  | 0.98233  |

|   |           |          |          |
|---|-----------|----------|----------|
| H | -4.39024  | 2.20439  | 1.4565   |
| C | -6.35917  | 0.96345  | -0.59561 |
| C | -4.2608   | -0.305   | 0.01157  |
| C | 5.98638   | 0.52576  | 0.63043  |
| C | 8.07043   | 0.16867  | -0.60097 |
| C | -5.7551   | -1.63569 | 2.16919  |
| H | -5.44169  | -2.5322  | 1.62154  |
| H | -6.4337   | -1.94998 | 2.96818  |
| H | -4.85381  | -1.21873 | 2.63383  |
| C | 5.36623   | -2.03465 | -2.16432 |
| H | 4.95294   | -2.88233 | -1.60498 |
| H | 6.07097   | -2.4294  | -2.90262 |
| H | 4.52954   | -1.57747 | -2.70539 |
| C | 6.04573   | -1.0424  | -1.24697 |
| C | -7.71757  | 1.22839  | -0.37704 |
| H | -8.22118  | 1.94217  | -1.02605 |
| C | 7.40114   | -0.74433 | -1.42158 |
| H | 7.94751   | -1.24097 | -2.22124 |
| C | -7.77528  | -0.32632 | 1.44451  |
| H | -8.3211   | -0.8277  | 2.24176  |
| C | -5.64564  | 1.67495  | -1.72686 |
| H | -5.00595  | 2.48701  | -1.36045 |
| H | -6.36978  | 2.11455  | -2.42    |
| H | -4.99845  | 0.99838  | -2.29447 |
| C | -9.89989  | 0.92641  | 0.87357  |
| H | -10.34649 | 1.41851  | 0.0035   |
| H | -10.02397 | 1.6006   | 1.73165  |
| H | -10.48244 | 0.02315  | 1.0882   |

|   |          |          |          |
|---|----------|----------|----------|
| C | 9.52852  | 0.49479  | -0.82879 |
| H | 10.07599 | -0.36833 | -1.22295 |
| H | 10.01798 | 0.81292  | 0.09795  |
| H | 9.64488  | 1.31102  | -1.5546  |
| C | 7.3456   | 0.7869   | 0.42183  |
| H | 7.84955  | 1.49346  | 1.0786   |
| C | 5.25229  | 1.2198   | 1.75819  |
| H | 4.46651  | 1.88902  | 1.38829  |
| H | 5.94442  | 1.81615  | 2.36082  |
| H | 4.76147  | 0.49946  | 2.42345  |

## 6. References:

- [1] Gaussian 09, Revision E.01, M. J. Frisch, G. W. Trucks, H. B. Schlegel, G. E. Scuseria, M. A. Robb, J. R. Cheeseman, G. Scalmani, V. Barone, B. Mennucci, G. A. Petersson, H. Nakatsuji, M. Caricato, X. Li, H. P. Hratchian, A. F. Izmaylov, J. Bloino, G. Zheng, J. L. Sonnenberg, M. Hada, M. Ehara, K. Toyota, R. Fukuda, J. Hasegawa, M. Ishida, T. Nakajima, Y. Honda, O. Kitao, H. Nakai, T. Vreven, J. A. Montgomery, Jr., J. E. Peralta, F. Ogliaro, M. Bearpark, J. J. Heyd, E. Brothers, K. N. Kudin, V. N. Staroverov, T. Keith, R. Kobayashi, J. Normand, K. Raghavachari, A. Rendell, J. C. Burant, S. S. Iyengar, J. Tomasi, M. Cossi, N. Rega, J. M. Millam, M. Klene, J. E. Knox, J. B. Cross, V. Bakken, C. Adamo, J. Jaramillo, R. Gomperts, R. E. Stratmann, O. Yazyev, A. J. Austin, R. Cammi, C. Pomelli, J. W. Ochterski, R. L. Martin, K. Morokuma, V. G. Zakrzewski, G. A. Voth, P. Salvador, J. J. Dannenberg, S. Dapprich, A. D. Daniels, O. Farkas, J. B. Foresman, J. V. Ortiz, J. Cioslowski, and D. J. Fox, Gaussian, Inc., Wallingford CT, 2013.
- [2] Becke, A. D. Density-functional exchange-energy approximation with correct asymptotic behavior. *Phys. Rev. A* **38**, 3098–3100 (1988).
